# Supplementary material
Source: MDPI journal article supplement (https://www.mdpi.com/2071-1050/16/1/188)
Supplement: s1 [file s1 › sustainability-2746008-supplementary.pdf]

## Supplementary Materials:

**Table S1.** Materials used to produce urea slow-release nitrogen (USRN) fertilizers and their methods.

| No. | Material                                                                         | Method            | Title                                                                                                                                                        | Year | Ref.  |
|-----|----------------------------------------------------------------------------------|-------------------|--------------------------------------------------------------------------------------------------------------------------------------------------------------|------|-------|
| 1   | Hydroxy Propyl Methyl Cellulose, Polyvinyl Alcohol, Glycerol, and Blended Paper. | Chemical Reaction | Synthesis and Characterization of Slow-Release Fertilizer Hydrogel Based on Hydroxy Propyl Methyl Cellulose, Polyvinyl Alcohol, Glycerol, and Blended Paper. | 2021 | [27]  |
| 2   | Calcium carbonate formaldehyde                                                   | Chemical Reaction | Calcium carbonate modified urea-formaldehyde resin adhesive for strength enhanced medium density fiberboard production                                       | 2021 | [108] |
| 3   | Chitosan, Humic Acid, silica compound                                            | Chemical Reaction | Review: Synthesis of Urea in Several Methods                                                                                                                 | 2021 | [52]  |
| 4   | Gypsum and gyp drywall waste cocrystals                                          | Mechanosynthesis  | Mechanochemically synthesized gypsum and gypsum drywall waste cocrystals with urea for enhanced environmental sustainability fertilizers.                    | 2020 | [109] |
| 5   | Polyester                                                                        | Granulation       | Degradable polyester/urea inclusion complex applied as a facile and environment-friendly strategy for slow-release fertilizer: Performance and mechanism     | 2020 | [110] |
| 6   | Silica                                                                           | Chemical Reaction | Urea-silica nanohybrids with potential applications for slow and precise release of nitrogen                                                                 | 2020 | [111] |
| 7   | Hydroxyapatite                                                                   | Chemical Reaction | Urea-Hydroxyapatite Nanohybrids for Slow Release of Nitrogen                                                                                                 | 2019 | [112] |
| 8   | Humic Acids                                                                      | Chemical Reaction | The use of humic acid urea fertilizer for increasing yield and utilization of nitrogen in sweet potato                                                       | 2017 | [113] |
| 9   | Brown Coal                                                                       | Granulation       | Hybrid brown coal-urea fertilizer reduces nitrogen loss compared to urea alone                                                                               | 2017 | [114] |
| 10  |                                                                                  |                   | A slow-release nitrogen fertilizer produced by simultaneous granulation and superheated steam drying of urea with brown coal                                 | 2016 | [115] |

|    |                                              |                      |                                                                                                                                     |      |       |
|----|----------------------------------------------|----------------------|-------------------------------------------------------------------------------------------------------------------------------------|------|-------|
| 11 | Boric acid-modified starch polyvinyl alcohol | Chemical Reaction    | Boric acid modified starch polyvinyl alcohol matrix for slow-release fertilizer.                                                    | 2016 | [42]  |
| 12 | Urea-formaldehyde                            | Chemical Reaction    | Slow-release fertilizers based on urea/urea-formaldehyde polymer nanocomposites                                                     | 2016 | [40]  |
| 13 | Clay                                         | Physical granulation | Synthesis of highly intercalated urea-clay nanocomposite via domestic montmorillonite as eco-friendly slow-release fertilizer       | 2016 | [116] |
| 14 | Cellulose                                    | Chemical Reaction    | A novel wheat straw cellulose-based semi-IPNs superabsorbent with integration of water-retaining and controlled-release fertilizers | 2015 | [117] |
| 15 | Starch + Lignin                              | Chemically modified  | Improvement of Hydrophobicity of Urea Modified Tapioca Starch Film with Lignin for Slow Release Fertilizer.                         | 2013 | [118] |
| 16 | Bentonite                                    | Chemical Reaction    | A novel slow-release urea fertilizer: Physical and chemical analysis of its structure and study of its release mechanism            | 2013 | [119] |
| 17 | Phosphogypsum                                | Chemical Reaction    | Production technology of nitrogen-sulfur-calcium fertilizers on the base of urea and phosphogypsum                                  | 2012 | [38]  |
| 18 | Hydroxyapatite                               | Chemical Reaction    | A green slow-release fertilizer composition based on urea-modified-hydroxyapatite nanoparticles encapsulated wood                   | 2011 | [57]  |
| 19 | Attapulgit (APT)                             | Physical granulation | Environmentally Friendly Slow-Release Nitrogen Fertilizer                                                                           | 2011 | [120] |
| 20 | calcium sulfate                              | Chemical Reaction    | Preparation methods of calcium sulfate and urea adduct                                                                              | 2007 | [37]  |
